# Supplementary material
Source: MDPI journal article supplement (https://www.mdpi.com/2079-6412/13/4/689)
Supplement: s1 [file s1 › coatings-2211492-supplementary.pdf]

Supplemental Information

Mixing, Fast and Slow: Assessing the efficiency of electronically conductive networks in hard carbon anodes

Manisha Anne Sawhney, Jenny Baker

| frequency<br>MHz | D2 carbon black  |                  |                  |                  |                  |                  | D2 carbon black  |                  |                  |                  |                  |                  | 3X carbon black  |                  |                  |                  |                  |                  | 5X carbon black  |                  |                  |                  |                  |                  |                  |                  |                  |                  |                  |                  |        |         |        |
|------------------|------------------|------------------|------------------|------------------|------------------|------------------|------------------|------------------|------------------|------------------|------------------|------------------|------------------|------------------|------------------|------------------|------------------|------------------|------------------|------------------|------------------|------------------|------------------|------------------|------------------|------------------|------------------|------------------|------------------|------------------|--------|---------|--------|
|                  | Cell1            |                  |                  | Cell2            |                  |                  |                  |                  |                  |                  |                  |                  |        |         |        |
|                  | Z <sub>ind</sub> |        |         |        |
| 10000.00         | 68.09            | -5.76            | 68.29            | 50.73            | -4.02            | 50.83            | 58.78            | -8.61            | 58.96            | 48.39            | -3.74            | 49.14            | 43.32            | -6.90            | 43.57            | 77.65            | -2.97            | 60.23            | 59.21            | -3.38            | 60.19            | -3.19            | 60.13            | -40.45           | -3.23            | 5.44             | 31.96            | -0.99            | 31.97            |                  |        |         |        |
| 7500.00          | 68.87            | -5.94            | 69.12            | 51.92            | -4.20            | 52.11            | 53.74            | -8.07            | 60.28            | 49.71            | -4.47            | 49.87            | 44.85            | -8.44            | 45.67            | 77.65            | -4.21            | 61.62            | 60.09            | -4.19            | 61.93            | -3.57            | 61.93            | -41.30           | -3.55            | 41.91            | -0.98            | 31.93            |                  |                  |        |         |        |
| 5000.00          | 69.87            | -6.11            | 70.14            | 52.65            | -4.59            | 52.85            | 60.70            | -9.05            | 61.37            | 50.66            | -4.70            | 49.87            | 46.85            | -8.70            | 48.85            | 79.76            | -4.47            | 61.62            | 60.74            | -4.30            | 62.13            | -3.90            | 62.25            | -41.90           | -4.27            | 0.10             | 5.47             | 31.73            | -1.40            | 31.78            |        |         |        |
| 4250.00          | 70.66            | -8.11            | 71.04            | 53.68            | -5.31            | 53.60            | 62.86            | -10.18           | 63.68            | 51.46            | -6.10            | 51.87            | 47.71            | -11.62           | 49.14            | 80.36            | -5.85            | 62.94            | 62.18            | -4.59            | 62.98            | -4.20            | 63.01            | -42.89           | -5.10            | 4.70             | 4.01             | 3.30             | 32.72            |                  |        |         |        |
| 3270.00          | 71.79            | -3.74            | 74.34            | 54.35            | -6.17            | 54.71            | 64.20            | -11.75           | 65.27            | 52.42            | -7.32            | 52.33            | 50.25            | -13.15           | 51.95            | 80.83            | -6.42            | 63.74            | 62.69            | -4.57            | 63.13            | -5.86            | 63.05            | -43.85           | -5.72            | -44.02           | 5.56             | -2.96            | 32.43            |                  |        |         |        |
| 2440.00          | 72.55            | -2.64            | 76.28            | 56.67            | -7.63            | 55.94            | 65.89            | -12.59           | 67.08            | 53.59            | -8.17            | 52.73            | 53.62            | -14.26           | 53.95            | 82.87            | -7.48            | 64.84            | 64.76            | -6.97            | 64.96            | -6.43            | -6.79            | -64.88           | -6.70            | 45.06            | 4.36             | -0.13            | 32.94            |                  |        |         |        |
| 1940.00          | 72.23            | -2.64            | 76.28            | 56.67            | -7.63            | 55.94            | 65.89            | -12.59           | 67.08            | 53.59            | -8.17            | 52.73            | 53.62            | -14.26           | 53.95            | 82.87            | -7.48            | 64.84            | 64.76            | -6.97            | 64.96            | -6.43            | -6.79            | -64.88           | -6.70            | 45.06            | 4.36             | -0.13            | 32.94            |                  |        |         |        |
| 1500.00          | 77.10            | -8.50            | 78.25            | 59.37            | -10.09           | 59.24            | 71.23            | -16.61           | 73.14            | 56.68            | -10.66           | 57.72            | 55.38            | -12.61           | 57.12            | 84.34            | -9.16            | 67.63            | 68.32            | -8.66            | 67.54            | -8.67            | 67.53            | -47.17           | -8.42            | 47.91            | 4.43             | -0.21            | 34.26            |                  |        |         |        |
| 1040.00          | 79.69            | -7.69            | 81.42            | 59.84            | -11.47           | 63.03            | 73.80            | -18.64           | 78.11            | 58.42            | -12.21           | 59.68            | 61.48            | -19.33           | 64.45            | 85.93            | -8.65            | 61.84            | 65.80            | -10.62           | 66.65            | -8.79            | 65.81            | -51.08           | -11.51           | 53.14            | 4.57             | -0.37            | 35.67            |                  |        |         |        |
| 790.00           | 82.18            | -8.04            | 84.36            | 61.66            | -13.06           | 63.03            | 77.13            | -20.84           | 79.30            | 60.52            | -13.91           | 62.10            | 64.89            | -20.96           | 68.19            | 82.54            | -8.76            | 65.74            | 71.42            | -11.61           | 63.65            | -71.77           | -82.90           | 72.31            | 51.08            | -11.51           | 53.14            | 4.57             | -0.37            | 35.67            |        |         |        |
| 594.00           | 85.51            | -2.161           | 88.20            | 63.80            | -14.80           | 65.43            | 80.57            | -23.34           | 83.88            | 62.84            | -15.65           | 64.76            | 68.46            | -22.81           | 72.16            | 85.74            | -12.76           | 72.59            | 71.42            | -11.61           | 63.65            | -71.77           | -82.90           | 72.31            | 51.08            | -11.51           | 53.14            | 4.57             | -0.37            | 35.67            |        |         |        |
| 448.00           | 88.99            | -24.57           | 92.32            | 66.08            | -16.72           | 68.17            | 84.53            | -25.91           | 88.47            | 65.36            | -17.57           | 67.68            | 72.42            | -24.82           | 76.56            | 85.19            | -21.53           | 72.58            | 82.03            | -16.32           | 73.48            | -12.74           | 72.59            | 71.42            | -11.61           | 63.65            | -71.77           | -82.90           | 72.31            | 51.08            |        |         |        |
| 333.00           | 93.33            | -27.17           | 97.38            | 68.70            | -18.34           | 71.28            | 88.33            | -28.70           | 93.45            | 68.29            | -19.60           | 71.05            | 76.54            | -27.03           | 81.16            | 75.48            | -14.30           | 68.68            | 76.22            | -16.23           | 77.93            | -55.97           | 44.70            | 47.91            | -0.49            | 4.73             | 5.53             | 3.98             | 36.88            | -5.43            | 37.28  |         |        |
| 256.00           | 98.24            | -31.77           | 103.10           | 71.77            | -21.48           | 74.91            | 93.89            | -31.92           | 99.16            | 71.45            | -21.69           | 74.73            | 81.23            | -29.62           | 86.57            | 78.10            | -15.79           | 71.61            | 79.20            | -20.53           | 84.70            | -61.3            | -17.15           | 63.49            | -0.85            | 4.83             | 6.05             | -0.68            | 6.09             | 37.92            | -6.13  | 38.41   |        |
| 193.00           | 103.40           | -34.99           | 109.10           | 74.82            | -24.45           | 76.72            | 98.30            | -35.43           | 105.10           | 74.62            | -24.58           | 76.56            | 85.97            | -32.51           | 91.82            | 80.32            | -19.20           | 77.67            | 85.31            | -22.90           | 88.33            | -63.80           | -18.80           | 66.51            | -0.69            | 5.02             | 6.35             | -0.68            | 6.20             | 38.91            | -6.88  | 39.52   |        |
| 145.00           | 108.90           | -38.83           | 115.10           | 78.09            | -27.89           | 82.93            | 104.20           | -38.53           | 111.40           | 77.81            | -27.79           | 82.62            | 91.04            | -35.73           | 91.80            | 86.16            | -21.35           | 84.93            | 88.64            | -25.71           | 88.64            | -25.71           | 88.64            | -25.71           | 88.64            | -25.71           | 88.64            | -25.71           | 88.64            | -25.71           | 88.64  | -25.71  | 88.64  |
| 109.00           | 113.60           | -40.77           | 123.00           | 81.00            | -30.25           | 87.80            | 110.00           | -44.51           | 118.60           | 81.27            | -31.94           | 87.33            | 96.38            | -39.57           | 94.20            | 89.22            | -35.90           | 96.17            | 100.70           | -40.11           | 100.70           | -40.11           | 100.70           | -40.11           | 100.70           | -40.11           | 100.70           | -40.11           | 100.70           | -40.11           | 100.70 | -40.11  | 100.70 |
| 82.60            | 116.00           | -46.77           | 131.00           | 85.60            | -37.74           | 93.55            | 116.30           | -50.05           | 126.90           | 85.12            | -37.33           | 92.94            | 102.10           | -44.71           | 104.20           | 93.26            | -37.48           | 99.10            | 103.59           | -45.28           | 103.59           | -45.28           | 103.59           | -45.28           | 103.59           | -45.28           | 103.59           | -45.28           | 103.59           | -45.28           | 103.59 | -45.28  | 103.59 |
| 62.50            | 126.40           | -54.93           | 139.50           | 90.22            | -44.59           | 100.60           | 123.50           | -57.98           | 136.50           | 89.63            | -44.04           | 98.86            | 108.20           | -49.62           | 119.10           | 96.93            | -47.48           | 109.10           | 107.00           | -50.11           | 107.00           | -50.11           | 107.00           | -50.11           | 107.00           | -50.11           | 107.00           | -50.11           | 107.00           | -50.11           | 107.00 | -50.11  | 107.00 |
| 47.150           | 136.40           | -62.40           | 150.00           | 95.63            | -52.87           | 107.60           | 131.60           | -66.78           | 147.80           | 95.03            | -52.31           | 108.50           | 114.90           | -56.60           | 126.20           | 102.50           | -55.46           | 133.20           | 108.59           | -52.18           | 108.59           | -52.18           | 108.59           | -52.18           | 108.59           | -52.18           | 108.59           | -52.18           | 108.59           | -52.18           | 108.59 | -52.18  | 108.59 |
| 35.650           | 144.80           | -71.52           | 161.00           | 102.20           | -63.08           | 120.10           | 141.50           | -77.21           | 161.20           | 101.70           | -62.88           | 119.30           | 122.40           | -65.45           | 136.80           | 112.00           | -65.46           | 143.20           | 113.60           | -65.77           | 113.60           | -65.77           | 113.60           | -65.77           | 113.60           | -65.77           | 113.60           | -65.77           | 113.60           | -65.77           | 113.60 | -65.77  | 113.60 |
| 268.30           | 154.40           | -82.49           | 175.00           | 110.30           | -75.42           | 133.60           | 162.90           | -88.58           | 149.00           | 119.80           | -88.58           | 149.00           | 141.30           | -90.86           | 161.00           | 130.90           | -91.72           | 153.80           | 127.70           | -90.51           | 153.80           | -90.51           | 153.80           | -90.51           | 153.80           | -90.51           | 153.80           | -90.51           | 153.80           | -90.51           | 153.80 | -90.51  | 153.80 |
| 202.40           | 162.20           | -95.68           | 191.00           | 120.10           | -90.16           | 150.20           | 166.20           | -103.70          | 195.90           | 131.70           | -104.90          | 174.10           | 159.80           | -107.40          | 174.10           | 159.80           | -107.40          | 174.10           | 159.80           | -107.40          | 174.10           | -107.40          | 174.10           | -107.40          | 174.10           | -107.40          | 174.10           | -107.40          | 174.10           | -107.40          | 174.10 | -107.40 | 174.10 |
| 152.60           | 177.80           | -102.30          | 213.00           | 132.10           | -107.80          | 170.50           | 181.60           | -120.10          | 217.90           | 151.60           | -124.90          | 192.00           | 167.70           | -122.40          | 207.10           | 158.00           | -128.50          | 203.70           | 163.30           | -128.50          | 203.70           | -128.50          | 203.70           | -128.50          | 203.70           | -128.50          | 203.70           | -128.50          | 203.70           | -128.50          | 203.70 | -128.50 | 203.70 |
| 88.65            | 209.30           | -165.30          | 234.00           | 164.10           | -162.00          | 223.70           | 209.30           | -183.90          | 245.50           | 185.90           | -183.90          | 245.50           | 185.90           | -183.90          | 245.50           | 185.90           | -183.90          | 245.50           | 185.90           | -183.90          | 245.50           | -183.90          | 245.50           | -183.90          | 245.50           | -183.90          | 245.50           | -183.90          | 245.50           | -183.90          | 245.50 | -183.90 | 245.50 |
| 65.51            | 230.10           | -183.90          | 254.50           | 185.10           | -180.50          | 259.50           | 244.60           | -194.30          | 266.20           | 207.50           | -194.30          | 266.20           | 207.50           | -194.30          | 266.20           | 207.50           | -194.30          | 266.20           | 207.50           | -194.30          | 266.20           | -194.30          | 266.20           | -194.30          | 266.20           | -194.30          | 266.20           | -194.30          | 266.20           | -194.30          | 266.20 | -194.30 | 266.20 |
| 48.00            | 257.10           | -221.30          | 339.50           | 213.10           | -217.40          | 347.80           | 275.40           | -215.60          | 349.80           | 237.50           | -215.60          | 349.80           | 237.50           | -215.60          | 349.80           | 237.50           | -215.60          | 349.80           | 237.50           | -215.60          | 349.80           | -215.60          | 349.80           | -215.60          | 349.80           | -215.60          | 349.80           | -215.60          | 349.80           | -215.60          | 349.80 | -215.60 | 349.80 |
| 37.28            | 285.60           | -258.40          | 385.30           | 240.00           | -251.70          | 407.00           | 319.30           | -252.00          | 417.20           | 279.90           | -252.00          | 417.20           | 279.90           | -252.00          | 417.20           | 279.90           | -252.00          | 417.20           | 279.90           | -252.00          | 417.20           | -252.00          | 417.20           | -252.00          | 417.20           | -252.00          | 417.20           | -252.00          | 417.20           | -252.00          | 417.20 | -252.00 | 417.20 |
| 28.12            | 322.00           | -306.20          | 444.30           | 276.40           | -302.00          | 475.20           | 379.90           | -300.10          | 503.30           | 306.90           | -300.10          | 503.30           | 306.90           | -300.10          | 503.30           | 306.90           | -300.10          | 503.30           | 306.90           | -300.10          | 503.30           | -300.10          | 503.30           | -300.10          | 503.30           | -300.10          | 503.30           | -300.10          | 503.30           | -300.10          | 503.30 | -300.10 | 503.30 |
| 16.00            | 476.60           | -425.50          | 594.50           | 368.10           | -413.50          | 553.60           | 425.40           | -392.30          | 571.90           | 364.30           | -412.00          | 543.40           | 438.60           | -409.90          | 531.40           | 355.20           | -409.90          | 531.40           | 355.20           | -409.90          | 531.40           | -409.90          | 531.40           | -409.90          | 531.40           | -409.90          | 531.40           | -409.90          | 531.40           | -409.90          | 531.40 | -409.90 | 531.40 |
| 9.10             | 548.60           | -501.20          | 691.60           | 425.90           | -465.00          | 645.40           | 477.50           | -445.30          | 652.90           | 411.40           | -487.40          | 677.80           | 478.80           | -478.80          | 677.80           | 478.80           | -478.80          | 677.80           | 478.80           | -478.80          | 677.80           | -478.80          | 677.80           | -478.80          | 677.80           | -478.80          | 677.80           | -478.80          | 677.80           | -478.80          | 677.80 | -478.80 | 677.80 |
| 6.87             | 633.20           | -688.10          | 935.10           | 573.10           | -668.60          | 880.70           | 598.00           | -668.60          | 880.70           | 598.00           | -668.60          | 880.70           | 598.00           | -668.60          | 880.70           | 598.00           | -668.60          | 880.70           | 598.00           | -668.60          | 880.70           | -668.60          | 880.70           | -668.60</        |                  |                  |                  |                  |                  |                  |        |         |        |

| frequency<br>Hz | 0% carbon black |                 |                 |                 |                 |                 | 1% carbon black |                 |                 |                 |                 |                 | 2% carbon black |                 |                 |                 |                 |                 | 3% carbon black |                 |                 |                 |                 |                 | 5% carbon black |                 |                 |                 |                 |                 | Cell4           |                 |                 |                 |                 |                 |                 |                 |                 |                 |                 |                 |                 |                 |                 |                 |                 |                 |                 |                 |                 |                 |                 |                 |                 |                 |                 |                 |                 |                 |                 |                 |                 |                 |                 |                 |                 |                 |                 |                 |                 |                 |                 |                 |                 |                 |                 |                 |                 |                 |                 |                 |                 |                 |                 |                 |                 |                 |                 |                 |                 |                 |                 |                 |                 |                 |                 |                 |                 |                 |                 |                 |                 |                 |                 |                 |                 |                 |                 |                 |                 |                 |                 |                 |                 |                 |                 |                 |                 |                 |                 |                 |                 |                 |                 |                 |                 |                 |                 |                 |                 |                 |                 |                 |                 |                 |                 |                 |                 |                 |                 |                 |                 |                 |                 |                 |                 |                 |                 |                 |                 |                 |                 |                 |                 |                 |                 |                 |                 |                 |                 |                 |                 |                 |                 |                 |                 |                 |                 |                 |                 |                 |                 |                 |                 |                 |                 |                 |                 |                 |                 |                 |                 |                 |                 |                 |                 |                 |                 |                 |                 |                 |                 |                 |                 |                 |                 |                 |                 |                 |                 |                 |                 |                 |                 |                 |                 |                 |                 |                 |                 |                 |                 |                 |                 |                 |                 |                 |                 |                 |                 |                 |                 |                 |                 |                 |                 |                 |                 |                 |                 |                 |                 |                 |                 |                 |                 |                 |                 |                 |                 |                 |                 |                 |                 |                 |                 |                 |                 |                 |                 |                 |                 |                 |                 |                 |                 |                 |                 |                 |                 |                 |                 |                 |                 |                 |                 |                 |                 |                 |                 |                 |                 |                 |                 |                 |                 |                 |                 |                 |                 |                 |                 |                 |                 |                 |                 |                 |                 |                 |                 |                 |                 |                 |                 |                 |                 |                 |                 |                 |                 |                 |                 |                 |                 |                 |                 |                 |                 |                 |                 |                 |                 |                 |                 |                 |                 |                 |                 |                 |                 |                 |                 |                 |                 |                 |                 |                 |                 |                 |                 |                 |                 |                 |                 |                 |                 |                 |                 |                 |                 |                 |                 |                 |                 |                 |                 |                 |                 |                 |                 |                 |                 |                 |                 |                 |                 |                 |                 |                 |                 |                 |                 |                 |                 |                 |                 |                 |                 |                 |                 |                 |                 |                 |                 |                 |                 |                 |                 |                 |                 |                 |                 |                 |                 |                 |                 |                 |                 |                 |                 |                 |                 |                 |                 |                 |                 |                 |                 |                 |                 |                 |                 |                 |                 |                 |                 |                 |                 |                 |                 |                 |                 |                 |                 |                 |                 |                 |                 |                 |                 |                 |                 |                 |                 |                 |                 |                 |                 |                 |                 |                 |                 |                 |                 |                 |                 |                 |                 |                 |                 |                 |                 |                 |                 |                 |                 |                 |                 |                 |                 |                 |                 |                 |                 |                 |                 |                 |                 |                 |                 |                 |                 |                 |                 |                 |                 |                 |                 |                 |                 |                 |                 |                 |                 |                 |                 |                 |                 |                 |                 |                 |                 |                 |                 |                 |                 |                 |                 |                 |                 |                 |                 |                 |                 |                 |                 |                 |                 |                 |                 |                 |                 |                 |                 |                 |                 |                 |                 |                 |                 |                 |                 |                 |                 |                 |                 |                 |                 |                 |                 |                 |                 |
|-----------------|-----------------|-----------------|-----------------|-----------------|-----------------|-----------------|-----------------|-----------------|-----------------|-----------------|-----------------|-----------------|-----------------|-----------------|-----------------|-----------------|-----------------|-----------------|-----------------|-----------------|-----------------|-----------------|-----------------|-----------------|-----------------|-----------------|-----------------|-----------------|-----------------|-----------------|-----------------|-----------------|-----------------|-----------------|-----------------|-----------------|-----------------|-----------------|-----------------|-----------------|-----------------|-----------------|-----------------|-----------------|-----------------|-----------------|-----------------|-----------------|-----------------|-----------------|-----------------|-----------------|-----------------|-----------------|-----------------|-----------------|-----------------|-----------------|-----------------|-----------------|-----------------|-----------------|-----------------|-----------------|-----------------|-----------------|-----------------|-----------------|-----------------|-----------------|-----------------|-----------------|-----------------|-----------------|-----------------|-----------------|-----------------|-----------------|-----------------|-----------------|-----------------|-----------------|-----------------|-----------------|-----------------|-----------------|-----------------|-----------------|-----------------|-----------------|-----------------|-----------------|-----------------|-----------------|-----------------|-----------------|-----------------|-----------------|-----------------|-----------------|-----------------|-----------------|-----------------|-----------------|-----------------|-----------------|-----------------|-----------------|-----------------|-----------------|-----------------|-----------------|-----------------|-----------------|-----------------|-----------------|-----------------|-----------------|-----------------|-----------------|-----------------|-----------------|-----------------|-----------------|-----------------|-----------------|-----------------|-----------------|-----------------|-----------------|-----------------|-----------------|-----------------|-----------------|-----------------|-----------------|-----------------|-----------------|-----------------|-----------------|-----------------|-----------------|-----------------|-----------------|-----------------|-----------------|-----------------|-----------------|-----------------|-----------------|-----------------|-----------------|-----------------|-----------------|-----------------|-----------------|-----------------|-----------------|-----------------|-----------------|-----------------|-----------------|-----------------|-----------------|-----------------|-----------------|-----------------|-----------------|-----------------|-----------------|-----------------|-----------------|-----------------|-----------------|-----------------|-----------------|-----------------|-----------------|-----------------|-----------------|-----------------|-----------------|-----------------|-----------------|-----------------|-----------------|-----------------|-----------------|-----------------|-----------------|-----------------|-----------------|-----------------|-----------------|-----------------|-----------------|-----------------|-----------------|-----------------|-----------------|-----------------|-----------------|-----------------|-----------------|-----------------|-----------------|-----------------|-----------------|-----------------|-----------------|-----------------|-----------------|-----------------|-----------------|-----------------|-----------------|-----------------|-----------------|-----------------|-----------------|-----------------|-----------------|-----------------|-----------------|-----------------|-----------------|-----------------|-----------------|-----------------|-----------------|-----------------|-----------------|-----------------|-----------------|-----------------|-----------------|-----------------|-----------------|-----------------|-----------------|-----------------|-----------------|-----------------|-----------------|-----------------|-----------------|-----------------|-----------------|-----------------|-----------------|-----------------|-----------------|-----------------|-----------------|-----------------|-----------------|-----------------|-----------------|-----------------|-----------------|-----------------|-----------------|-----------------|-----------------|-----------------|-----------------|-----------------|-----------------|-----------------|-----------------|-----------------|-----------------|-----------------|-----------------|-----------------|-----------------|-----------------|-----------------|-----------------|-----------------|-----------------|-----------------|-----------------|-----------------|-----------------|-----------------|-----------------|-----------------|-----------------|-----------------|-----------------|-----------------|-----------------|-----------------|-----------------|-----------------|-----------------|-----------------|-----------------|-----------------|-----------------|-----------------|-----------------|-----------------|-----------------|-----------------|-----------------|-----------------|-----------------|-----------------|-----------------|-----------------|-----------------|-----------------|-----------------|-----------------|-----------------|-----------------|-----------------|-----------------|-----------------|-----------------|-----------------|-----------------|-----------------|-----------------|-----------------|-----------------|-----------------|-----------------|-----------------|-----------------|-----------------|-----------------|-----------------|-----------------|-----------------|-----------------|-----------------|-----------------|-----------------|-----------------|-----------------|-----------------|-----------------|-----------------|-----------------|-----------------|-----------------|-----------------|-----------------|-----------------|-----------------|-----------------|-----------------|-----------------|-----------------|-----------------|-----------------|-----------------|-----------------|-----------------|-----------------|-----------------|-----------------|-----------------|-----------------|-----------------|-----------------|-----------------|-----------------|-----------------|-----------------|-----------------|-----------------|-----------------|-----------------|-----------------|-----------------|-----------------|-----------------|-----------------|-----------------|-----------------|-----------------|-----------------|-----------------|-----------------|-----------------|-----------------|-----------------|-----------------|-----------------|-----------------|-----------------|-----------------|-----------------|-----------------|-----------------|-----------------|-----------------|-----------------|-----------------|-----------------|-----------------|-----------------|-----------------|-----------------|-----------------|-----------------|-----------------|-----------------|-----------------|-----------------|-----------------|-----------------|-----------------|-----------------|-----------------|-----------------|-----------------|-----------------|-----------------|-----------------|-----------------|-----------------|-----------------|-----------------|-----------------|-----------------|-----------------|-----------------|-----------------|-----------------|-----------------|-----------------|-----------------|-----------------|-----------------|-----------------|-----------------|-----------------|-----------------|-----------------|-----------------|-----------------|-----------------|-----------------|-----------------|-----------------|-----------------|-----------------|-----------------|-----------------|-----------------|-----------------|-----------------|-----------------|-----------------|-----------------|-----------------|-----------------|-----------------|-----------------|-----------------|-----------------|-----------------|-----------------|-----------------|-----------------|-----------------|-----------------|-----------------|-----------------|-----------------|-----------------|-----------------|-----------------|-----------------|-----------------|-----------------|-----------------|-----------------|-----------------|-----------------|-----------------|-----------------|-----------------|-----------------|-----------------|-----------------|-----------------|-----------------|-----------------|-----------------|-----------------|-----------------|-----------------|-----------------|-----------------|-----------------|-----------------|-----------------|-----------------|-----------------|-----------------|-----------------|-----------------|-----------------|-----------------|-----------------|-----------------|-----------------|-----------------|-----------------|-----------------|-----------------|-----------------|-----------------|-----------------|-----------------|-----------------|-----------------|
|                 | Z <sub>no</sub> | Z <sub>no</sub> | l <sub>no</sub> | l <sub>no</sub> | Z <sub>no</sub> | l <sub>no</sub> | Z <sub>no</sub> | Z <sub>no</sub> | l <sub>no</sub> | l <sub>no</sub> | Z <sub>no</sub> | l <sub>no</sub> | Z <sub>no</sub> | l <sub>no</sub> | l <sub>no</sub> | Z <sub>no</sub> | l <sub>no</sub> | l <sub>no</sub> | Z <sub>no</sub> | l <sub>no</sub> | l <sub>no</sub> | Z <sub>no</sub> | l <sub>no</sub> | l <sub>no</sub> | Z <sub>no</sub> | l <sub>no</sub> | l <sub>no</sub> | Z <sub>no</sub> | l <sub>no</sub> | l <sub>no</sub> | Z <sub>no</sub> | l <sub>no</sub> | l <sub>no</sub> | Z <sub>no</sub> | l <sub>no</sub> | l <sub>no</sub> | Z <sub>no</sub> | l <sub>no</sub> | l <sub>no</sub> | Z <sub>no</sub> | l <sub>no</sub> | l <sub>no</sub> | Z <sub>no</sub> | l <sub>no</sub> | l <sub>no</sub> | Z <sub>no</sub> | l <sub>no</sub> | l <sub>no</sub> | Z <sub>no</sub> | l <sub>no</sub> | l <sub>no</sub> | Z <sub>no</sub> | l <sub>no</sub> | l <sub>no</sub> | Z <sub>no</sub> | l <sub>no</sub> | l <sub>no</sub> | Z <sub>no</sub> | l <sub>no</sub> | l <sub>no</sub> | Z <sub>no</sub> | l <sub>no</sub> | l <sub>no</sub> | Z <sub>no</sub> | l <sub>no</sub> | l <sub>no</sub> | Z <sub>no</sub> | l <sub>no</sub> | l <sub>no</sub> | Z <sub>no</sub> | l <sub>no</sub> | l <sub>no</sub> | Z <sub>no</sub> | l <sub>no</sub> | l <sub>no</sub> | Z <sub>no</sub> | l <sub>no</sub> | l <sub>no</sub> | Z <sub>no</sub> | l <sub>no</sub> | l <sub>no</sub> | Z <sub>no</sub> | l <sub>no</sub> | l <sub>no</sub> | Z <sub>no</sub> | l <sub>no</sub> | l <sub>no</sub> | Z <sub>no</sub> | l <sub>no</sub> | l <sub>no</sub> | Z <sub>no</sub> | l <sub>no</sub> | l <sub>no</sub> | Z <sub>no</sub> | l <sub>no</sub> | l <sub>no</sub> | Z <sub>no</sub> | l <sub>no</sub> | l <sub>no</sub> | Z <sub>no</sub> | l <sub>no</sub> | l <sub>no</sub> | Z <sub>no</sub> | l <sub>no</sub> | l <sub>no</sub> | Z <sub>no</sub> | l <sub>no</sub> | l <sub>no</sub> | Z <sub>no</sub> | l <sub>no</sub> | l <sub>no</sub> | Z <sub>no</sub> | l <sub>no</sub> | l <sub>no</sub> | Z <sub>no</sub> | l <sub>no</sub> | l <sub>no</sub> | Z <sub>no</sub> | l <sub>no</sub> | l <sub>no</sub> | Z <sub>no</sub> | l <sub>no</sub> | l <sub>no</sub> | Z <sub>no</sub> | l <sub>no</sub> | l <sub>no</sub> | Z <sub>no</sub> | l <sub>no</sub> | l <sub>no</sub> | Z <sub>no</sub> | l <sub>no</sub> | l <sub>no</sub> | Z <sub>no</sub> | l <sub>no</sub> | l <sub>no</sub> | Z <sub>no</sub> | l <sub>no</sub> | l <sub>no</sub> | Z <sub>no</sub> | l <sub>no</sub> | l <sub>no</sub> | Z <sub>no</sub> | l <sub>no</sub> | l <sub>no</sub> | Z <sub>no</sub> | l <sub>no</sub> | l <sub>no</sub> | Z <sub>no</sub> | l <sub>no</sub> | l <sub>no</sub> | Z <sub>no</sub> | l <sub>no</sub> | l <sub>no</sub> | Z <sub>no</sub> | l <sub>no</sub> | l <sub>no</sub> | Z <sub>no</sub> | l <sub>no</sub> | l <sub>no</sub> | Z <sub>no</sub> | l <sub>no</sub> | l <sub>no</sub> | Z <sub>no</sub> | l <sub>no</sub> | l <sub>no</sub> | Z <sub>no</sub> | l <sub>no</sub> | l <sub>no</sub> | Z <sub>no</sub> | l <sub>no</sub> | l <sub>no</sub> | Z <sub>no</sub> | l <sub>no</sub> | l <sub>no</sub> | Z <sub>no</sub> | l <sub>no</sub> | l <sub>no</sub> | Z <sub>no</sub> | l <sub>no</sub> | l <sub>no</sub> | Z <sub>no</sub> | l <sub>no</sub> | l <sub>no</sub> | Z <sub>no</sub> | l <sub>no</sub> | l <sub>no</sub> | Z <sub>no</sub> | l <sub>no</sub> | l <sub>no</sub> | Z <sub>no</sub> | l <sub>no</sub> | l <sub>no</sub> | Z <sub>no</sub> | l <sub>no</sub> | l <sub>no</sub> | Z <sub>no</sub> | l <sub>no</sub> | l <sub>no</sub> | Z <sub>no</sub> | l <sub>no</sub> | l <sub>no</sub> | Z <sub>no</sub> | l <sub>no</sub> | l <sub>no</sub> | Z <sub>no</sub> | l <sub>no</sub> | l <sub>no</sub> | Z <sub>no</sub> | l <sub>no</sub> | l <sub>no</sub> | Z <sub>no</sub> | l <sub>no</sub> | l <sub>no</sub> | Z <sub>no</sub> | l <sub>no</sub> | l <sub>no</sub> | Z <sub>no</sub> | l <sub>no</sub> | l <sub>no</sub> | Z <sub>no</sub> | l <sub>no</sub> | l <sub>no</sub> | Z <sub>no</sub> | l <sub>no</sub> | l <sub>no</sub> | Z <sub>no</sub> | l <sub>no</sub> | l <sub>no</sub> | Z <sub>no</sub> | l <sub>no</sub> | l <sub>no</sub> | Z <sub>no</sub> | l <sub>no</sub> | l <sub>no</sub> | Z <sub>no</sub> | l <sub>no</sub> | l <sub>no</sub> | Z <sub>no</sub> | l <sub>no</sub> | l <sub>no</sub> | Z <sub>no</sub> | l <sub>no</sub> | l <sub>no</sub> | Z <sub>no</sub> | l <sub>no</sub> | l <sub>no</sub> | Z <sub>no</sub> | l <sub>no</sub> | l <sub>no</sub> | Z <sub>no</sub> | l <sub>no</sub> | l <sub>no</sub> | Z <sub>no</sub> | l <sub>no</sub> | l <sub>no</sub> | Z <sub>no</sub> | l <sub>no</sub> | l <sub>no</sub> | Z <sub>no</sub> | l <sub>no</sub> | l <sub>no</sub> | Z <sub>no</sub> | l <sub>no</sub> | l <sub>no</sub> | Z <sub>no</sub> | l <sub>no</sub> | l <sub>no</sub> | Z <sub>no</sub> | l <sub>no</sub> | l <sub>no</sub> | Z <sub>no</sub> | l <sub>no</sub> | l <sub>no</sub> | Z <sub>no</sub> | l <sub>no</sub> | l <sub>no</sub> | Z <sub>no</sub> | l <sub>no</sub> | l <sub>no</sub> | Z <sub>no</sub> | l <sub>no</sub> | l <sub>no</sub> | Z <sub>no</sub> | l <sub>no</sub> | l <sub>no</sub> | Z <sub>no</sub> | l <sub>no</sub> | l <sub>no</sub> | Z <sub>no</sub> | l <sub>no</sub> | l <sub>no</sub> | Z <sub>no</sub> | l <sub>no</sub> | l <sub>no</sub> | Z <sub>no</sub> | l <sub>no</sub> | l <sub>no</sub> | Z <sub>no</sub> | l <sub>no</sub> | l <sub>no</sub> | Z <sub>no</sub> | l <sub>no</sub> | l <sub>no</sub> | Z <sub>no</sub> | l <sub>no</sub> | l <sub>no</sub> | Z <sub>no</sub> | l <sub>no</sub> | l <sub>no</sub> | Z <sub>no</sub> | l <sub>no</sub> | l <sub>no</sub> | Z <sub>no</sub> | l <sub>no</sub> | l <sub>no</sub> | Z <sub>no</sub> | l <sub>no</sub> | l <sub>no</sub> | Z <sub>no</sub> | l <sub>no</sub> | l <sub>no</sub> | Z <sub>no</sub> | l <sub>no</sub> | l <sub>no</sub> | Z <sub>no</sub> | l <sub>no</sub> | l <sub>no</sub> | Z <sub>no</sub> | l <sub>no</sub> | l <sub>no</sub> | Z <sub>no</sub> | l <sub>no</sub> | l <sub>no</sub> | Z <sub>no</sub> | l <sub>no</sub> | l <sub>no</sub> | Z <sub>no</sub> | l <sub>no</sub> | l <sub>no</sub> | Z <sub>no</sub> | l <sub>no</sub> | l <sub>no</sub> | Z <sub>no</sub> | l <sub>no</sub> | l <sub>no</sub> | Z <sub>no</sub> | l <sub>no</sub> | l <sub>no</sub> | Z <sub>no</sub> | l <sub>no</sub> | l <sub>no</sub> | Z <sub>no</sub> | l <sub>no</sub> | l <sub>no</sub> | Z <sub>no</sub> | l <sub>no</sub> | l <sub>no</sub> | Z <sub>no</sub> | l <sub>no</sub> | l <sub>no</sub> | Z <sub>no</sub> | l <sub>no</sub> | l <sub>no</sub> | Z <sub>no</sub> | l <sub>no</sub> | l <sub>no</sub> | Z <sub>no</sub> | l <sub>no</sub> | l <sub>no</sub> | Z <sub>no</sub> | l <sub>no</sub> | l <sub>no</sub> | Z <sub>no</sub> | l <sub>no</sub> | l <sub>no</sub> | Z <sub>no</sub> | l <sub>no</sub> | l <sub>no</sub> | Z <sub>no</sub> | l <sub>no</sub> | l <sub>no</sub> | Z <sub>no</sub> | l <sub>no</sub> | l <sub>no</sub> | Z <sub>no</sub> | l <sub>no</sub> | l <sub>no</sub> | Z <sub>no</sub> | l <sub>no</sub> | l <sub>no</sub> | Z <sub>no</sub> | l <sub>no</sub> | l <sub>no</sub> | Z <sub>no</sub> | l <sub>no</sub> | l <sub>no</sub> | Z <sub>no</sub> | l <sub>no</sub> | l <sub>no</sub> | Z <sub>no</sub> | l <sub>no</sub> | l <sub>no</sub> | Z <sub>no</sub> | l <sub>no</sub> | l <sub>no</sub> | Z <sub>no</sub> | l <sub>no</sub> | l <sub>no</sub> | Z <sub>no</sub> | l <sub>no</sub> | l <sub>no</sub> | Z <sub>no</sub> | l <sub>no</sub> | l <sub>no</sub> | Z <sub>no</sub> | l <sub>no</sub> | l <sub>no</sub> | Z <sub>no</sub> | l <sub>no</sub> | l <sub>no</sub> | Z <sub>no</sub> | l <sub>no</sub> | l <sub>no</sub> | Z <sub>no</sub> | l <sub>no</sub> | l <sub>no</sub> | Z <sub>no</sub> | l <sub>no</sub> | l <sub>no</sub> | Z <sub>no</sub> | l <sub>no</sub> | l <sub>no</sub> | Z <sub>no</sub> | l <sub>no</sub> | l <sub>no</sub> | Z <sub>no</sub> | l <sub>no</sub> | l <sub>no</sub> | Z <sub>no</sub> | l <sub>no</sub> | l <sub>no</sub> | Z <sub>no</sub> | l <sub>no</sub> | l <sub>no</sub> | Z <sub>no</sub> | l <sub>no</sub> | l <sub>no</sub> | Z <sub>no</sub> | l <sub>no</sub> | l <sub>no</sub> | Z <sub>no</sub> | l <sub>no</sub> | l <sub>no</sub> | Z <sub>no</sub> | l <sub>no</sub> | l <sub>no</sub> | Z <sub>no</sub> | l <sub>no</sub> | l <sub>no</sub> | Z <sub>no</sub> | l <sub>no</sub> | l <sub>no</sub> | Z <sub>no</sub> | l <sub>no</sub> | l <sub>no</sub> | Z <sub>no</sub> | l <sub>no</sub> | l <sub>no</sub> | Z <sub>no</sub> | l <sub>no</sub> | l <sub>no</sub> | Z <sub>no</sub> | l <sub>no</sub> | l <sub>no</sub> | Z <sub>no</sub> | l <sub>no</sub> | l <sub>no</sub> | Z <sub>no</sub> | l <sub>no</sub> | l <sub>no</sub> | Z <sub>no</sub> | l <sub>no</sub> | l <sub>no</sub> | Z <sub>no</sub> | l <sub>no</sub> | l <sub>no</sub> | Z <sub>no</sub> | l <sub>no</sub> | l <sub>no</sub> | Z <sub>no</sub> | l <sub>no</sub> | l <sub>no</sub> | Z <sub>no</sub> | l <sub>no</sub> | l <sub>no</sub> | Z <sub>no</sub> | l <sub>no</sub> | l <sub>no</sub> | Z <sub>no</sub> | l <sub>no</sub> | l <sub>no</sub> | Z <sub>no</sub> | l <sub>no</sub> | l <sub>no</sub> | Z <sub>no</sub> | l <sub>no</sub> | l <sub>no</sub> | Z <sub>no</sub> | l <sub>no</sub> | l <sub>no</sub> | Z <sub>no</sub> | l <sub>no</sub> | l <sub>no</sub> | Z <sub>no</sub> | l <sub>no</sub> | l <sub>no</sub> | Z <sub>no</sub> | l <sub>no</sub> | l <sub>no</sub> | Z <sub>no</sub> | l <sub>no</sub> | l <sub>no</sub> | Z <sub>no</sub> |

| frequency in Hz | 0% carbon black |                 |                |                |                 |                | 1% carbon black |                 |                |                |                 |                | 2% carbon black |                 |                |                |                 |                | 3% carbon black |                 |                |                |                 |                |
|-----------------|-----------------|-----------------|----------------|----------------|-----------------|----------------|-----------------|-----------------|----------------|----------------|-----------------|----------------|-----------------|-----------------|----------------|----------------|-----------------|----------------|-----------------|-----------------|----------------|----------------|-----------------|----------------|
|                 | Cell 1          |                 |                | Cell 2         |                 |                | Cell 1          |                 |                | Cell 2         |                 |                | Cell 1          |                 |                | Cell 2         |                 |                | Cell 1          |                 |                | Cell 2         |                 |                |
|                 | Z' in $\Omega$  | Z'' in $\Omega$ | Z  in $\Omega$ | Z' in $\Omega$ | Z'' in $\Omega$ | Z  in $\Omega$ | Z' in $\Omega$  | Z'' in $\Omega$ | Z  in $\Omega$ | Z' in $\Omega$ | Z'' in $\Omega$ | Z  in $\Omega$ | Z' in $\Omega$  | Z'' in $\Omega$ | Z  in $\Omega$ | Z' in $\Omega$ | Z'' in $\Omega$ | Z  in $\Omega$ | Z' in $\Omega$  | Z'' in $\Omega$ | Z  in $\Omega$ | Z' in $\Omega$ | Z'' in $\Omega$ | Z  in $\Omega$ |
| 100000.00       | 55.20           | -6.50           | 55.59          | 246.50         | -12.38          | 246.80         | 36.73           | -2.67           | 36.82          | 64.18          | -3.01           | 64.25          | 54.19           | -3.69           | 54.31          | 40.70          | -2.57           | 40.78          | 75.20           | -5.45           | 75.39          | 42.59          | -3.45           | 42.73          |
| 75430.00        | 56.43           | -7.88           | 56.97          | 252.70         | -13.31          | 253.00         | 37.09           | -3.71           | 37.28          | 64.62          | -3.10           | 64.70          | 54.99           | -4.06           | 55.14          | 41.37          | -3.30           | 41.50          | 76.74           | -6.77           | 77.04          | 43.13          | -3.71           | 43.29          |
| 56900.00        | 57.60           | -9.35           | 58.35          | 255.00         | -13.82          | 255.40         | 37.80           | -4.05           | 38.01          | 64.79          | -3.73           | 64.90          | 55.51           | -4.93           | 55.73          | 41.63          | -3.83           | 41.80          | 77.58           | -8.06           | 78.00          | 43.59          | -4.14           | 43.78          |
| 42920.00        | 59.31           | -10.34          | 60.20          | 255.80         | -16.23          | 256.30         | 38.60           | -4.87           | 38.90          | 65.31          | -4.87           | 65.49          | 56.36           | -5.57           | 56.63          | 42.39          | -4.54           | 42.63          | 79.00           | -8.96           | 79.51          | 44.44          | -5.06           | 44.73          |
| 32370.00        | 61.17           | -12.51          | 62.44          | 258.80         | -16.53          | 259.30         | 39.33           | -5.54           | 39.71          | 66.37          | -5.57           | 66.60          | 57.58           | -6.61           | 57.96          | 43.38          | -5.34           | 43.71          | 80.55           | -10.40          | 81.22          | 45.56          | -6.13           | 45.97          |
| 24420.00        | 63.49           | -14.61          | 65.15          | 261.70         | -17.46          | 262.20         | 40.19           | -6.41           | 40.70          | 67.33          | -6.56           | 67.65          | 58.56           | -7.51           | 59.04          | 44.18          | -6.36           | 44.64          | 82.52           | -12.20          | 83.42          | 46.41          | -6.92           | 46.92          |
| 18420.00        | 65.52           | -16.83          | 67.65          | 265.70         | -19.21          | 266.30         | 41.25           | -7.35           | 41.90          | 68.31          | -7.60           | 68.73          | 59.88           | -8.46           | 60.48          | 45.39          | -7.13           | 45.94          | 84.20           | -13.07          | 85.21          | 47.44          | -7.95           | 48.11          |
| 13900.00        | 68.48           | -19.15          | 71.10          | 267.90         | -20.74          | 268.70         | 42.50           | -8.41           | 43.33          | 69.68          | -8.77           | 70.23          | 61.35           | -9.54           | 62.09          | 46.36          | -8.34           | 47.10          | 86.45           | -14.45          | 87.65          | 48.63          | -9.01           | 49.46          |
| 10480.00        | 71.84           | -21.74          | 75.05          | 272.50         | -23.18          | 273.50         | 43.97           | -9.52           | 44.99          | 71.10          | -9.89           | 71.73          | 62.94           | -10.62          | 63.83          | 47.80          | -9.31           | 48.70          | 89.04           | -16.47          | 90.55          | 50.16          | -10.60          | 51.27          |
| 7906.00         | 75.38           | -24.67          | 79.31          | 276.00         | -25.67          | 277.20         | 45.52           | -10.76          | 46.77          | 72.61          | -11.23          | 73.47          | 64.74           | -12.04          | 65.85          | 49.28          | -10.53          | 50.39          | 92.02           | -18.06          | 93.77          | 51.82          | -12.11          | 53.22          |
| 5964.00         | 79.55           | -27.65          | 84.22          | 280.50         | -27.48          | 281.80         | 47.29           | -12.16          | 48.83          | 74.51          | -12.64          | 75.57          | 66.57           | -13.48          | 67.93          | 50.94          | -11.96          | 52.33          | 95.02           | -19.95          | 97.09          | 53.85          | -13.81          | 55.59          |
| 4498.00         | 84.18           | -30.86          | 89.66          | 285.10         | -30.32          | 286.70         | 49.27           | -13.70          | 51.14          | 76.64          | -14.30          | 77.96          | 68.71           | -15.12          | 70.35          | 53.04          | -13.44          | 54.72          | 98.40           | -22.10          | 100.90         | 55.99          | -15.77          | 58.17          |
| 3393.00         | 89.01           | -34.54          | 95.47          | 289.40         | -33.23          | 291.30         | 51.45           | -15.41          | 53.71          | 78.86          | -16.15          | 80.50          | 71.14           | -17.00          | 73.14          | 55.18          | -15.18          | 57.23          | 102.10          | -24.56          | 105.00         | 58.58          | -17.83          | 61.23          |
| 2560.00         | 94.48           | -38.61          | 102.10         | 294.90         | -36.46          | 297.10         | 54.15           | -17.34          | 56.86          | 81.70          | -18.14          | 83.69          | 74.22           | -19.11          | 76.64          | 57.81          | -17.06          | 60.28          | 106.50          | -27.20          | 109.90         | 61.78          | -20.27          | 65.02          |
| 1931.00         | 99.73           | -43.55          | 108.80         | 300.50         | -40.74          | 303.20         | 56.79           | -19.44          | 60.02          | 86.98          | -20.38          | 89.33          | 77.24           | -21.54          | 80.19          | 60.60          | -19.22          | 63.58          | 110.90          | -30.33          | 114.90         | 65.08          | -22.92          | 68.99          |
| 1456.00         | 105.30          | -49.57          | 116.40         | 307.40         | -43.60          | 310.50         | 59.50           | -21.82          | 63.37          | 89.82          | -22.79          | 92.66          | 80.57           | -24.14          | 84.11          | 63.58          | -21.41          | 67.09          | 115.80          | -33.60          | 120.50         | 68.75          | -25.70          | 73.40          |
| 1099.00         | 111.30          | -57.46          | 125.30         | 314.40         | -50.05          | 318.30         | 62.31           | -24.68          | 67.02          | 92.78          | -25.93          | 96.34          | 84.21           | -27.18          | 88.49          | 66.69          | -24.14          | 70.92          | 121.10          | -37.55          | 126.80         | 72.82          | -28.93          | 78.36          |
| 828.60          | 118.40          | -67.54          | 136.30         | 321.20         | -56.46          | 326.10         | 65.18           | -28.49          | 71.13          | 95.63          | -29.87          | 100.20         | 88.10           | -30.87          | 93.35          | 69.79          | -27.35          | 74.96          | 126.90          | -42.16          | 133.80         | 77.23          | -32.66          | 83.85          |
| 625.10          | 126.90          | -80.02          | 150.00         | 329.40         | -63.94          | 335.50         | 68.39           | -33.36          | 76.09          | 98.69          | -35.02          | 104.70         | 92.39           | -35.05          | 98.82          | 73.02          | -31.35          | 79.47          | 133.40          | -47.36          | 141.50         | 82.11          | -36.84          | 90.00          |
| 471.50          | 137.50          | -95.19          | 167.20         | 338.10         | -73.65          | 346.00         | 71.58           | -39.73          | 81.86          | 102.20         | -41.77          | 110.40         | 97.01           | -40.46          | 105.10         | 76.57          | -36.65          | 84.88          | 140.50          | -53.49          | 150.30         | 87.40          | -42.02          | 96.97          |
| 355.60          | 150.60          | -113.10         | 188.40         | 347.90         | -85.49          | 358.30         | 75.49           | -48.02          | 89.47          | 106.50         | -50.46          | 117.80         | 102.20          | -47.12          | 112.60         | 80.52          | -43.41          | 91.48          | 148.40          | -60.72          | 160.40         | 93.26          | -48.26          | 105.00         |
| 268.30          | 166.60          | -134.00         | 213.80         | 359.40         | -99.71          | 373.00         | 80.52           | -58.48          | 93.52          | 111.80         | -61.50          | 127.60         | 108.30          | -55.31          | 121.60         | 85.40          | -52.08          | 100.00         | 157.20          | -69.31          | 171.80         | 100.00         | -55.85          | 114.50         |
| 202.40          | 185.90          | -158.10         | 244.10         | 372.70         | -116.80         | 390.60         | 86.95           | -71.35          | 112.50         | 118.60         | -75.08          | 140.40         | 115.40          | -65.26          | 132.60         | 91.42          | -62.86          | 110.90         | 167.30          | -79.46          | 185.20         | 107.90         | -64.87          | 125.90         |
| 152.00          | 200.10          | -105.00         | 270.40         | 300.20         | -137.00         | 411.00         | 95.06           | -07.12          | 123.20         | 127.30         | -01.05          | 156.90         | 124.10          | -77.26          | 146.20         | 99.07          | -70.10          | 124.90         | 170.90          | -01.51          | 200.90         | 117.30         | -75.54          | 139.50         |
| 115.10          | 234.50          | -217.00         | 319.50         | 406.70         | -162.10         | 437.80         | 105.90          | -106.00         | 149.80         | 138.30         | -111.60         | 177.80         | 134.60          | -91.63          | 162.80         | 108.90         | -91.77          | 142.40         | 192.20          | -105.70         | 219.30         | 128.50         | -87.84          | 155.60         |
| 86.85           | 266.90          | -254.60         | 368.80         | 428.80         | -190.90         | 469.40         | 119.50          | -128.40         | 175.40         | 151.70         | -134.80         | 203.00         | 147.20          | -108.30         | 182.80         | 121.90         | -110.50         | 164.10         | 207.30          | -121.60         | 240.30         | 141.60         | -102.00         | 174.50         |
| 65.51           | 303.40          | -297.90         | 425.20         | 454.70         | -225.70         | 507.70         | 135.80          | -155.40         | 206.30         | 168.60         | -163.20         | 234.70         | 161.90          | -127.80         | 206.30         | 136.20         | -132.70         | 190.10         | 225.10          | -140.90         | 265.50         | 156.80         | -118.40         | 196.50         |
| 48.00           | 351.00          | -355.00         | 499.20         | 488.80         | -271.30         | 559.10         | 157.50          | -190.20         | 246.90         | 191.70         | -200.90         | 277.70         | 181.90          | -153.60         | 238.10         | 156.10         | -160.80         | 224.10         | 248.20          | -165.60         | 298.30         | 175.50         | -138.80         | 223.70         |
| 37.28           | 395.60          | -409.10         | 569.10         | 522.00         | -314.90         | 609.60         | 179.80          | -224.40         | 287.50         | 214.00         | -236.50         | 318.90         | 201.40          | -178.10         | 268.90         | 176.10         | -187.70         | 257.40         | 271.60          | -190.60         | 331.80         | 193.70         | -158.50         | 250.30         |
| 28.12           | 453.90          | -477.90         | 659.20         | 564.80         | -371.50         | 676.00         | 210.30          | -268.80         | 341.30         | 246.30         | -286.00         | 377.50         | 227.10          | -209.40         | 308.90         | 202.90         | -222.80         | 301.30         | 299.30          | -220.50         | 371.70         | 216.90         | -183.90         | 284.40         |
| 21.21           | 522.90          | -558.80         | 765.30         | 615.60         | -438.90         | 756.10         | 246.50          | -322.50         | 405.90         | 283.70         | -343.20         | 445.30         | 258.60          | -241.90         | 354.10         | 235.60         | -263.60         | 353.50         | 332.60          | -255.20         | 419.20         | 244.10         | -214.40         | 324.90         |
| 16.00           | 602.50          | -651.80         | 887.70         | 675.50         | -516.60         | 850.40         | 290.40          | -385.20         | 482.40         | 330.80         | -410.10         | 526.90         | 293.10          | -287.00         | 410.20         | 273.30         | -311.00         | 414.00         | 370.60          | -295.80         | 474.20         | 274.80         | -247.60         | 369.90         |
| 12.07           | 695.00          | -760.20         | 1030.00        | 744.90         | -608.40         | 961.80         | 344.20          | -457.10         | 572.20         | 386.40         | -488.60         | 622.90         | 338.20          | -339.10         | 479.00         | 317.80         | -364.90         | 483.90         | 414.10          | -342.90         | 537.70         | 310.70         | -288.20         | 423.80         |
| 9.10            | 801.60          | -885.60         | 1195.00        | 825.30         | -718.10         | 1094.00        | 408.90          | -542.00         | 678.90         | 454.50         | -580.30         | 737.10         | 388.10          | -394.50         | 553.40         | 369.50         | -428.30         | 585.70         | 466.60          | -397.00         | 612.60         | 351.00         | -335.70         | 485.70         |
| 6.87            | 919.00          | -1034.00        | 1383.00        | 915.60         | -845.50         | 1246.00        | 483.70          | -640.30         | 802.50         | 534.60         | -686.80         | 870.30         | 446.80          | -458.20         | 640.00         | 429.10         | -501.40         | 660.00         | 525.20          | -456.90         | 696.10         | 398.90         | -391.40         | 558.90         |
| 5.18            | 1056.00         | -1211.00        | 1607.00        | 1019.00        | -1001.00        | 1428.00        | 571.20          | -753.60         | 945.60         | 624.70         | -812.50         | 1025.00        | 513.90          | -533.10         | 740.50         | 499.70         | -586.60         | 770.60         | 594.00          | -528.80         | 795.30         | 454.00         | -456.70         | 643.90         |
| 3.91            | 1209.00         | -1426.00        | 1869.00        | 1137.00        | -1190.00        | 1646.00        | 673.40          | -886.60         | 1113.00        | 736.40         | -958.30         | 1209.00        | 591.40          | -616.70         | 854.50         | 580.90         | -686.00         | 898.90         | 672.90          | -610.60         | 908.70         | 518.60         | -532.80         | 743.60         |
| 2.95            | 1386.00         | -1670.00        | 2170.00        | 1266.00        | -1423.00        | 1905.00        | 794.50          | -1042.00        | 1310.00        | 858.90         | -1132.00        | 1421.00        | 676.50          | -713.60         | 983.30         | 673.80         | -806.70         | 1051.00        | 766.20          | -706.20         | 1042.00        | 589.90         | -622.50         | 857.60         |
| 2.22            | 1572.00         | -1975.00        | 2524.00        | 1423.00        | -1701.00        | 2217.00        | 921.10          | -1229.00        | 1536.00        | 996.00         | -1337.00        | 1667.00        | 772.80          | -827.00         | 1132.00        | 771.90         | -943.20         | 1219.00        | 861.70          | -809.40         | 1182.00        | 676.50         | -725.80         | 932.20         |
| 1.68            | 1798.00         | -2354.00        | 2962.00        | 1609.00        | -2057.00        | 2612.00        | 1077.00         | -1460.00        | 1814.00        | 1160.00        | -1590.00        | 1968.00        | 874.00          | -962.70         | 1300.00        |                |                 |                |                 |                 |                |                |                 |                |

| frequency<br>in Hz | 0% carbon black |         |        |        |         |        | 1% carbon black |         |        |        |         |        |        |         |        | 2% carbon black |         |        |        |         |        |        |         |        | 3% carbon black |         |        |        |         |        |        |         |        |        |         |        |       |  |
|--------------------|-----------------|---------|--------|--------|---------|--------|-----------------|---------|--------|--------|---------|--------|--------|---------|--------|-----------------|---------|--------|--------|---------|--------|--------|---------|--------|-----------------|---------|--------|--------|---------|--------|--------|---------|--------|--------|---------|--------|-------|--|
|                    | Cell1           |         |        | Cell2  |         |        | Cell1           |         |        | Cell2  |         |        | Cell3  |         |        | Cell1           |         |        | Cell2  |         |        | Cell3  |         |        | Cell1           |         |        | Cell2  |         |        | Cell3  |         |        | Cell1  |         |        | Cell2 |  |
|                    | Z'in Ω          | Z''in Ω | Z in Ω | Z'in Ω | Z''in Ω | Z in Ω | Z'in Ω          | Z''in Ω | Z in Ω | Z'in Ω | Z''in Ω | Z in Ω | Z'in Ω | Z''in Ω | Z in Ω | Z'in Ω          | Z''in Ω | Z in Ω | Z'in Ω | Z''in Ω | Z in Ω | Z'in Ω | Z''in Ω | Z in Ω | Z'in Ω          | Z''in Ω | Z in Ω | Z'in Ω | Z''in Ω | Z in Ω | Z'in Ω | Z''in Ω | Z in Ω | Z'in Ω | Z''in Ω | Z in Ω |       |  |
| 100000.00          | 45.95           | -3.71   | 46.10  | 61.58  | -4.28   | 61.73  | 51.02           | -5.46   | 51.31  | 53.89  | -6.23   | 54.25  | 60.86  | -5.72   | 61.13  | 44.05           | -2.80   | 44.14  | 37.11  | -2.36   | 37.18  | 41.08  | -2.11   | 41.14  | 52.15           | -2.72   | 52.22  | 51.33  | -3.23   | 51.43  |        |         |        |        |         |        |       |  |
| 75430.00           | 46.68           | -4.62   | 46.91  | 62.59  | -5.14   | 62.80  | 51.80           | -6.39   | 52.19  | 54.76  | -6.95   | 55.20  | 62.00  | -6.79   | 62.37  | 44.55           | -3.57   | 44.70  | 37.53  | -3.28   | 37.67  | 42.01  | -2.55   | 42.08  | 52.50           | -3.55   | 52.62  | 51.64  | -3.79   | 51.78  |        |         |        |        |         |        |       |  |
| 56900.00           | 47.49           | -5.40   | 47.79  | 63.11  | -5.63   | 63.36  | 53.15           | -7.60   | 53.69  | 55.73  | -7.79   | 56.27  | 63.31  | -7.21   | 63.72  | 45.06           | -4.23   | 45.25  | 38.31  | -3.24   | 38.45  | 42.45  | -3.34   | 42.58  | 53.36           | -3.91   | 53.52  | 52.65  | -4.52   | 52.84  |        |         |        |        |         |        |       |  |
| 42920.00           | 48.77           | -6.37   | 49.18  | 64.13  | -7.32   | 64.55  | 54.33           | -8.99   | 55.06  | 57.26  | -9.61   | 58.06  | 64.49  | -9.39   | 65.17  | 45.94           | -5.15   | 46.22  | 39.09  | -3.95   | 39.28  | 42.72  | -3.94   | 42.90  | 53.61           | -4.71   | 53.82  | 52.87  | -5.29   | 53.13  |        |         |        |        |         |        |       |  |
| 32370.00           | 49.49           | -7.48   | 50.05  | 65.51  | -7.82   | 65.97  | 55.81           | -9.99   | 56.70  | 58.81  | -10.62  | 59.76  | 66.21  | -10.66  | 67.06  | 46.66           | -5.65   | 47.00  | 39.79  | -4.67   | 40.06  | 43.53  | -4.51   | 43.77  | 54.51           | -5.39   | 54.77  | 54.11  | -5.94   | 54.44  |        |         |        |        |         |        |       |  |
| 24420.00           | 50.74           | -8.96   | 51.53  | 66.89  | -9.08   | 67.50  | 57.41           | -11.33  | 58.51  | 61.05  | -11.95  | 62.21  | 67.78  | -11.92  | 68.82  | 48.02           | -6.70   | 48.49  | 40.40  | -5.15   | 40.73  | 44.23  | -5.33   | 44.55  | 55.52           | -6.33   | 55.88  | 54.96  | -7.43   | 55.46  |        |         |        |        |         |        |       |  |
| 18420.00           | 52.12           | -9.95   | 53.06  | 68.19  | -10.31  | 68.97  | 59.26           | -12.83  | 60.63  | 63.24  | -13.49  | 64.66  | 70.04  | -14.32  | 71.49  | 48.83           | -7.51   | 49.40  | 41.36  | -6.18   | 41.82  | 45.02  | -6.26   | 45.46  | 56.63           | -7.14   | 57.08  | 56.27  | -8.34   | 56.88  |        |         |        |        |         |        |       |  |
| 13900.00           | 53.76           | -11.53  | 54.96  | 70.16  | -11.54  | 71.10  | 61.60           | -14.36  | 63.25  | 65.52  | -14.62  | 67.13  | 72.77  | -16.61  | 74.64  | 50.03           | -8.54   | 50.76  | 42.28  | -7.04   | 42.87  | 46.24  | -6.87   | 46.75  | 58.05           | -7.85   | 58.58  | 57.69  | -9.41   | 58.45  |        |         |        |        |         |        |       |  |
| 10480.00           | 55.66           | -13.05  | 57.17  | 71.88  | -13.39  | 73.12  | 63.85           | -16.27  | 65.89  | 68.25  | -16.05  | 70.11  | 75.59  | -18.85  | 77.91  | 51.38           | -9.70   | 52.29  | 43.42  | -8.01   | 44.15  | 47.32  | -8.13   | 48.01  | 59.19           | -9.02   | 59.87  | 59.31  | -10.64  | 60.25  |        |         |        |        |         |        |       |  |
| 7906.00            | 57.87           | -14.73  | 59.71  | 74.10  | -15.09  | 75.62  | 66.60           | -18.32  | 69.07  | 71.13  | -17.64  | 73.28  | 78.98  | -21.02  | 81.73  | 52.89           | -11.06  | 54.03  | 44.63  | -9.13   | 45.55  | 48.69  | -9.29   | 49.57  | 60.79           | -10.05  | 61.62  | 61.22  | -12.01  | 62.33  |        |         |        |        |         |        |       |  |
| 5964.00            | 60.33           | -16.59  | 62.57  | 76.63  | -16.95  | 78.48  | 69.65           | -20.55  | 72.61  | 74.19  | -19.08  | 76.60  | 82.81  | -23.32  | 86.03  | 54.74           | -12.51  | 56.15  | 46.16  | -10.33  | 47.31  | 50.17  | -10.50  | 51.26  | 62.52           | -11.32  | 63.54  | 63.51  | -13.41  | 64.31  |        |         |        |        |         |        |       |  |
| 4498.00            | 63.00           | -18.48  | 65.65  | 79.44  | -18.89  | 81.68  | 73.01           | -23.07  | 76.57  | 77.51  | -20.73  | 80.24  | 87.05  | -25.68  | 90.76  | 56.78           | -14.19  | 58.53  | 47.82  | -11.67  | 49.23  | 51.87  | -11.79  | 53.19  | 64.37           | -12.53  | 65.58  | 65.92  | -14.85  | 67.57  |        |         |        |        |         |        |       |  |
| 3393.00            | 65.80           | -20.72  | 68.98  | 82.38  | -21.10  | 85.03  | 76.80           | -25.81  | 81.02  | 80.89  | -22.65  | 84.01  | 91.49  | -28.21  | 95.74  | 59.03           | -16.05  | 61.17  | 49.62  | -13.18  | 51.34  | 53.80  | -13.21  | 55.39  | 66.53           | -13.92  | 67.97  | 68.59  | -16.22  | 70.48  |        |         |        |        |         |        |       |  |
| 2560.00            | 68.95           | -23.30  | 72.78  | 85.71  | -23.57  | 88.90  | 81.26           | -28.93  | 86.25  | 84.84  | -24.75  | 88.38  | 96.66  | -30.96  | 101.50 | 61.73           | -18.13  | 64.34  | 51.70  | -14.82  | 53.79  | 55.98  | -14.84  | 57.32  | 69.05           | -15.41  | 70.75  | 71.61  | -17.72  | 73.77  |        |         |        |        |         |        |       |  |
| 1931.00            | 72.03           | -26.55  | 76.77  | 88.76  | -26.70  | 92.69  | 85.72           | -32.35  | 91.62  | 88.78  | -27.21  | 92.95  | 101.80 | -33.92  | 107.30 | 64.43           | -20.46  | 67.60  | 53.67  | -16.81  | 56.24  | 57.97  | -16.64  | 60.32  | 71.45           | -16.99  | 73.45  | 74.50  | -19.30  | 76.96  |        |         |        |        |         |        |       |  |
| 1456.00            | 75.32           | -30.54  | 81.27  | 91.94  | -30.50  | 96.67  | 90.44           | -36.15  | 97.40  | 92.88  | -29.39  | 97.60  | 107.00 | -37.37  | 113.40 | 67.27           | -23.19  | 71.15  | 55.61  | -19.24  | 58.85  | 59.93  | -18.86  | 62.82  | 73.84           | -18.76  | 76.19  | 77.34  | -20.95  | 80.13  |        |         |        |        |         |        |       |  |
| 1099.00            | 79.04           | -35.73  | 86.74  | 95.54  | -35.55  | 101.90 | 95.51           | -40.92  | 103.90 | 97.21  | -33.41  | 102.80 | 112.80 | -41.34  | 120.10 | 70.32           | -26.58  | 75.17  | 57.67  | -22.47  | 61.89  | 61.94  | -21.93  | 65.71  | 76.20           | -21.08  | 79.06  | 80.18  | -23.20  | 83.47  |        |         |        |        |         |        |       |  |
| 828.60             | 83.34           | -42.26  | 93.44  | 99.66  | -42.14  | 108.20 | 101.00          | -46.92  | 111.40 | 101.90 | -37.62  | 108.60 | 118.90 | -46.26  | 127.60 | 73.74           | -30.80  | 79.91  | 59.93  | -26.73  | 65.62  | 64.07  | -25.93  | 69.12  | 78.63           | -24.14  | 82.26  | 82.99  | -26.17  | 87.02  |        |         |        |        |         |        |       |  |
| 625.10             | 88.57           | -50.32  | 101.90 | 104.80 | -50.20  | 116.20 | 107.30          | -54.23  | 120.20 | 107.10 | -42.64  | 115.20 | 125.60 | -52.15  | 136.00 | 77.57           | -36.08  | 85.52  | 62.62  | -32.22  | 70.42  | 66.60  | -31.16  | 73.53  | 81.26           | -28.14  | 85.99  | 86.03  | -30.07  | 91.13  |        |         |        |        |         |        |       |  |
| 471.50             | 94.99           | -60.09  | 112.40 | 111.20 | -59.96  | 126.30 | 114.80          | -63.25  | 131.10 | 112.70 | -48.83  | 122.80 | 133.10 | -59.12  | 145.60 | 82.04           | -42.48  | 92.38  | 66.03  | -39.19  | 76.78  | 69.65  | -37.95  | 79.32  | 84.23           | -33.24  | 90.55  | 89.42  | -35.07  | 96.05  |        |         |        |        |         |        |       |  |
| 355.60             | 102.90          | -71.74  | 125.50 | 119.10 | -71.66  | 139.00 | 123.80          | -73.97  | 144.20 | 118.90 | -56.50  | 131.60 | 141.40 | -67.58  | 156.70 | 87.44           | -50.42  | 100.90 | 70.97  | -47.90  | 85.13  | 73.64  | -46.48  | 87.08  | 87.75           | -39.94  | 96.41  | 93.31  | -41.50  | 102.10 |        |         |        |        |         |        |       |  |
| 268.30             | 112.60          | -85.58  | 141.40 | 128.90 | -85.41  | 154.60 | 134.70          | -86.48  | 160.10 | 125.90 | -65.69  | 142.10 | 150.70 | -77.71  | 169.50 | 93.93           | -59.92  | 111.40 | 75.97  | -59.48  | 95.87  | 78.75  | -57.04  | 97.24  | 92.20           | -48.26  | 104.10 | 98.13  | -49.62  | 110.00 |        |         |        |        |         |        |       |  |
| 202.40             | 124.40          | -101.70 | 160.70 | 140.50 | -101.30 | 173.20 | 147.70          | -100.80 | 178.80 | 134.00 | -77.45  | 154.80 | 161.20 | -93.87  | 194.60 | 101.80          | -71.22  | 124.20 | 83.17  | -71.19  | 109.50 | 85.32  | -69.83  | 110.30 | 97.75           | -59.55  | 113.90 | 104.00 | -59.60  | 119.80 |        |         |        |        |         |        |       |  |
| 152.60             | 138.40          | -120.50 | 183.50 | 151.30 | -119.80 | 195.10 | 163.00          | -117.20 | 200.80 | 113.60 | -91.65  | 170.10 | 173.20 | -101.70 | 202.40 | 111.20          | -84.65  | 139.80 | 92.19  | -86.33  | 126.30 | 93.81  | -85.33  | 126.80 | 104.80          | -71.05  | 126.70 | 111.90 | -71.84  | 132.40 |        |         |        |        |         |        |       |  |
| 115.10             | 154.80          | -142.50 | 210.40 | 170.30 | -141.50 | 221.40 | 180.70          | -135.50 | 225.80 | 154.90 | -109.30 | 189.50 | 187.10 | -122.60 | 223.70 | 122.30          | -100.50 | 158.30 | 103.30 | -104.20 | 146.70 | 104.40 | -103.60 | 147.10 | 113.60          | -86.00  | 142.50 | 120.20 | -86.47  | 148.10 |        |         |        |        |         |        |       |  |
| 86.85              | 174.10          | -167.40 | 241.50 | 188.60 | -166.50 | 251.60 | 200.60          | -155.50 | 253.90 | 168.50 | -129.90 | 212.70 | 203.40 | -143.40 | 248.80 | 135.90          | -119.30 | 190.80 | 117.20 | -125.20 | 171.50 | 118.10 | -125.30 | 172.20 | 124.90          | -103.50 | 162.20 | 131.70 | -103.70 | 167.60 |        |         |        |        |         |        |       |  |
| 65.51              | 197.70          | -197.80 | 278.90 | 210.20 | -197.40 | 288.30 | 223.60          | -179.50 | 286.80 | 185.10 | -155.30 | 241.60 | 222.80 | -169.00 | 279.70 | 151.20          | -141.20 | 206.90 | 133.60 | -150.10 | 201.00 | 134.40 | -151.10 | 202.20 | 138.30          | -124.40 | 186.00 | 145.00 | -124.20 | 190.90 |        |         |        |        |         |        |       |  |
| 48.00              | 226.00          | -237.90 | 329.20 | 239.20 | -239.10 | 336.20 | 252.30          | -210.70 | 328.70 | 208.00 | -188.90 | 281.00 | 249.00 | -202.70 | 321.10 | 172.10          | -170.80 | 242.50 | 155.10 | -182.20 | 239.30 | 155.80 | -184.30 | 241.30 | 155.60          | -151.60 | 217.20 | 162.50 | -151.10 | 221.90 |        |         |        |        |         |        |       |  |
| 37.28              | 255.20          | -277.70 | 377.20 | 266.60 | -279.70 | 386.50 | 279.90          | -241.40 | 369.60 | 229.10 | -221.60 | 316.70 | 274.60 | -236.30 | 362.30 | 182.00          | -198.30 | 276.80 | 176.70 | -219.50 | 277.20 | 178.00 | -216.60 | 280.30 | 172.80          | -178.00 | 248.10 | 179.90 | -177.20 | 252.50 |        |         |        |        |         |        |       |  |
| 28.12              | 291.20          | -328.50 | 439.00 | 303.30 | -332.70 | 450.20 | 313.00          | -280.10 | 420.00 | 260.80 | -264.30 | 371.30 | 307.30 | -278.30 | 414.60 | 217.70          | -237.00 | 321.90 | 206.20 | -254.00 | 327.20 | 206.00 | -260.50 | 332.10 | 195.40          | -219.00 | 289.10 | 203.10 | -211.60 | 293.30 |        |         |        |        |         |        |       |  |
| 21.21              | 333.90          | -369.80 | 513.30 | 347.30 | -386.10 | 526.80 | 352.20          | -326.50 | 480.20 | 296.60 | -314.80 | 432.50 | 345.70 | -328.40 | 476.80 | 251.40          | -281.40 | 377.40 | 240.20 | -303.40 | 387.00 | 242.00 | -308.80 | 392.30 | 222.30          | -255.00 | 339.30 | 230.70 | -253.60 | 342.80 |        |         |        |        |         |        |       |  |
| 16.00              | 384.60          | -463.00 | 601.90 | 400.40 | -471.90 | 616.90 | 396.20          | -382.20 | 550.50 | 340.00 | -373.80 | 505.30 | 391.90 | -386.60 | 550.50 | 290.00          | -333.90 | 442.20 | 282.60 | -360.50 | 458.10 | 283.80 | -366.20 | 464.90 | 258.60          | -306.10 | 399.40 | 284.90 | -302.30 | 402.00 |        |         |        |        |         |        |       |  |
| 12.07              | 444.10          | -549.10 | 706.20 | 451.60 | -560.30 | 725.90 | 449.50          | -446.40 | 6      |        |         |        |        |         |        |                 |         |        |        |         |        |        |         |        |                 |         |        |        |         |        |        |         |        |        |         |        |       |  |

| frequency<br>in Hz | 0% carbon black |                 |                |               |                 |                | 1% carbon black |                 |                |               |                 |                | 2% carbon black |                 |                |               |                 |                | 3% carbon black |                 |                |               |                 |                |
|--------------------|-----------------|-----------------|----------------|---------------|-----------------|----------------|-----------------|-----------------|----------------|---------------|-----------------|----------------|-----------------|-----------------|----------------|---------------|-----------------|----------------|-----------------|-----------------|----------------|---------------|-----------------|----------------|
|                    | Cell1           |                 |                | Cell2         |                 |                | Cell1           |                 |                | Cell2         |                 |                | Cell1           |                 |                | Cell2         |                 |                | Cell1           |                 |                | Cell2         |                 |                |
|                    | Z'in $\Omega$   | Z'' in $\Omega$ | Z  in $\Omega$ | Z'in $\Omega$ | Z'' in $\Omega$ | Z  in $\Omega$ | Z'in $\Omega$   | Z'' in $\Omega$ | Z  in $\Omega$ | Z'in $\Omega$ | Z'' in $\Omega$ | Z  in $\Omega$ | Z'in $\Omega$   | Z'' in $\Omega$ | Z  in $\Omega$ | Z'in $\Omega$ | Z'' in $\Omega$ | Z  in $\Omega$ | Z'in $\Omega$   | Z'' in $\Omega$ | Z  in $\Omega$ | Z'in $\Omega$ | Z'' in $\Omega$ | Z  in $\Omega$ |
| 100000.0           | 62.03           | -6.18           | 62.33          | 56.03         | -5.84           | 56.34          | 39.14           | -5.14           | 39.48          | 45.91         | -5.42           | 46.22          | 69.87           | -2.67           | 69.92          | 52.95         | -3.54           | 53.07          | 54.02           | -6.37           | 54.47          | 49.35         | -3.73           | 49.49          |
| 75430.00           | 63.97           | -7.52           | 64.41          | 57.47         | -7.28           | 57.93          | 40.03           | -6.22           | 40.51          | 46.37         | -6.52           | 46.82          | 69.99           | -3.29           | 70.07          | 54.08         | -4.74           | 54.29          | 55.54           | -8.57           | 56.20          | 49.91         | -4.18           | 50.09          |
| 56900.00           | 64.96           | -8.55           | 65.52          | 58.47         | -8.25           | 59.05          | 41.02           | -7.34           | 41.67          | 47.79         | -7.77           | 48.42          | 70.48           | -4.25           | 70.60          | 54.39         | -5.66           | 54.68          | 57.52           | -9.10           | 58.23          | 50.37         | -5.08           | 50.62          |
| 42920.00           | 66.30           | -10.50          | 67.13          | 59.53         | -9.94           | 60.35          | 42.60           | -8.75           | 43.49          | 49.29         | -9.26           | 50.15          | 70.79           | -4.43           | 70.93          | 56.20         | -6.49           | 56.57          | 58.51           | -9.93           | 59.34          | 51.58         | -6.02           | 51.93          |
| 32370.00           | 67.65           | -12.10          | 68.72          | 60.57         | -11.73          | 61.69          | 44.37           | -10.43          | 45.58          | 50.88         | -10.41          | 51.93          | 72.05           | -5.68           | 72.27          | 56.92         | -7.72           | 57.44          | 61.24           | -11.74          | 62.35          | 52.65         | -7.55           | 53.18          |
| 24420.00           | 69.34           | -13.81          | 70.70          | 62.56         | -13.97          | 64.10          | 45.88           | -12.15          | 47.46          | 52.68         | -12.07          | 54.05          | 73.05           | -6.59           | 73.35          | 58.28         | -8.31           | 58.87          | 63.32           | -12.49          | 64.54          | 53.56         | -8.57           | 54.24          |
| 18420.00           | 71.76           | -16.00          | 73.53          | 65.05         | -16.55          | 67.12          | 47.82           | -13.79          | 49.77          | 54.86         | -13.74          | 56.55          | 73.95           | -8.01           | 74.39          | 59.85         | -9.71           | 60.64          | 65.59           | -13.28          | 66.92          | 55.26         | -10.15          | 56.18          |
| 13900.00           | 74.78           | -18.41          | 77.02          | 67.66         | -19.01          | 70.28          | 50.28           | -15.72          | 52.68          | 57.03         | -15.50          | 59.10          | 75.59           | -9.23           | 76.15          | 61.47         | -10.74          | 62.40          | 68.01           | -14.16          | 69.47          | 57.14         | -11.64          | 58.31          |
| 10480.00           | 77.84           | -20.82          | 80.57          | 70.50         | -22.01          | 73.85          | 52.71           | -17.89          | 55.66          | 59.79         | -17.60          | 62.32          | 76.82           | -10.60          | 77.55          | 63.16         | -12.25          | 64.34          | 70.26           | -15.16          | 71.88          | 59.03         | -13.24          | 60.49          |
| 7906.00            | 81.35           | -23.81          | 84.77          | 74.05         | -25.69          | 78.38          | 55.76           | -20.05          | 59.26          | 62.87         | -19.85          | 65.93          | 78.47           | -12.06          | 79.39          | 65.20         | -13.72          | 66.63          | 72.82           | -16.33          | 74.63          | 61.35         | -14.92          | 63.14          |
| 5964.00            | 85.47           | -26.65          | 89.53          | 78.40         | -29.25          | 83.68          | 59.08           | -22.48          | 63.21          | 66.15         | -22.03          | 69.72          | 80.47           | -13.80          | 81.64          | 67.55         | -15.32          | 69.27          | 75.56           | -17.73          | 77.61          | 64.06         | -16.64          | 66.19          |
| 4498.00            | 90.08           | -29.71          | 94.85          | 83.30         | -33.33          | 89.71          | 62.84           | -25.09          | 67.66          | 69.93         | -24.50          | 74.10          | 82.68           | -15.74          | 84.17          | 70.20         | -17.10          | 72.25          | 78.47           | -19.27          | 80.80          | 66.96         | -18.45          | 69.45          |
| 3393.00            | 94.97           | -33.06          | 100.60         | 88.92         | -37.66          | 96.57          | 66.78           | -28.09          | 72.45          | 73.88         | -27.23          | 78.74          | 85.19           | -17.83          | 87.04          | 73.04         | -19.02          | 75.47          | 81.49           | -21.09          | 84.17          | 70.29         | -20.36          | 73.18          |
| 2560.00            | 100.40          | -36.67          | 106.90         | 95.35         | -42.34          | 104.30         | 70.99           | -31.43          | 77.64          | 78.31         | -30.13          | 83.90          | 88.19           | -20.11          | 90.46          | 76.50         | -21.01          | 79.33          | 85.20           | -23.14          | 88.28          | 73.88         | -22.26          | 77.16          |
| 1931.00            | 105.90          | -40.95          | 113.60         | 102.00        | -47.58          | 112.50         | 75.07           | -35.65          | 83.11          | 82.49         | -33.62          | 89.08          | 89.93           | -22.65          | 92.74          | 79.78         | -23.21          | 83.09          | 88.72           | -25.49          | 92.31          | 77.47         | -24.40          | 81.22          |
| 1456.00            | 111.40          | -45.93          | 120.50         | 109.30        | -53.40          | 121.70         | 79.32           | -40.73          | 89.17          | 86.51         | -37.71          | 94.37          | 92.81           | -25.60          | 96.27          | 83.08         | -25.57          | 86.92          | 92.46           | -28.16          | 96.66          | 81.01         | -26.73          | 85.31          |
| 1099.00            | 117.50          | -52.27          | 128.60         | 117.20        | -60.40          | 131.80         | 83.98           | -47.61          | 96.54          | 90.99         | -43.50          | 100.90         | 95.80           | -29.46          | 100.20         | 86.46         | -28.64          | 91.08          | 96.42           | -31.51          | 101.40         | 84.83         | -29.77          | 89.90          |
| 828.60             | 124.30          | -60.40          | 138.20         | 125.80        | -68.72          | 143.30         | 89.21           | -56.53          | 105.60         | 95.53         | -51.00          | 108.30         | 98.66           | -34.44          | 104.50         | 89.78         | -32.67          | 95.54          | 100.60          | -35.79          | 106.80         | 88.72         | -33.60          | 94.87          |
| 625.10             | 132.20          | -70.45          | 149.80         | 135.40        | -78.87          | 156.70         | 95.62           | -67.75          | 117.20         | 101.10        | -60.67          | 117.90         | 102.00          | -41.09          | 109.90         | 93.44         | -37.87          | 100.80         | 105.30          | -40.99          | 113.00         | 93.00         | -38.42          | 100.60         |
| 471.50             | 141.50          | -82.60          | 163.90         | 146.30        | -90.99          | 172.30         | 103.80          | -81.78          | 132.20         | 107.90        | -73.03          | 130.30         | 105.90          | -49.72          | 117.00         | 97.59         | -44.71          | 107.30         | 110.60          | -47.48          | 120.30         | 97.68         | -44.50          | 107.30         |
| 355.80             | 152.80          | -97.25          | 181.10         | 158.80        | -105.40         | 190.60         | 114.40          | -98.74          | 151.10         | 116.60        | -88.31          | 146.30         | 110.90          | -60.85          | 126.50         | 102.60        | -53.47          | 115.70         | 116.80          | -55.40          | 129.20         | 103.10        | -52.14          | 115.60         |
| 268.30             | 166.40          | -114.60         | 202.00         | 173.70        | -122.80         | 212.70         | 127.80          | -118.70         | 174.50         | 127.50        | -106.70         | 166.30         | 117.40          | -74.74          | 139.20         | 108.80        | -64.35          | 126.40         | 124.00          | -65.07          | 140.10         | 109.50        | -61.59          | 125.60         |
| 202.40             | 182.70          | -134.80         | 227.00         | 190.70        | -143.10         | 238.40         | 144.50          | -141.90         | 202.50         | 141.30        | -128.70         | 191.20         | 126.00          | -91.73          | 155.80         | 116.70        | -77.62          | 140.10         | 132.60          | -76.57          | 153.10         | 117.10        | -73.15          | 138.10         |
| 152.60             | 201.20          | -157.60         | 255.60         | 209.70        | -168.50         | 267.70         | 165.00          | -168.80         | 236.00         | 158.60        | -154.50         | 221.40         | 137.00          | -112.30         | 177.10         | 126.40        | -93.62          | 157.30         | 142.80          | -90.31          | 169.00         | 126.40        | -87.25          | 153.50         |
| 115.10             | 223.90          | -184.60         | 290.20         | 232.50        | -194.20         | 303.00         | 188.90          | -198.50         | 274.00         | 178.70        | -184.20         | 256.60         | 151.00          | -136.50         | 203.60         | 138.70        | -112.60         | 178.60         | 154.80          | -106.60         | 187.90         | 137.60        | -104.10         | 172.50         |
| 86.85              | 251.60          | -215.70         | 331.40         | 259.90        | -227.90         | 345.60         | 218.80          | -233.60         | 320.10         | 204.80        | -219.80         | 300.40         | 168.30          | -164.40         | 235.30         | 153.40        | -134.00         | 203.70         | 168.60          | -125.30         | 210.00         | 151.00        | -123.60         | 195.10         |
| 65.51              | 282.30          | -252.30         | 378.60         | 290.00        | -267.40         | 394.40         | 251.90          | -273.20         | 371.60         | 234.70        | -261.20         | 351.10         | 189.60          | -198.10         | 274.20         | 171.40        | -160.10         | 234.50         | 185.00          | -148.30         | 237.10         | 167.50        | -147.40         | 223.10         |
| 48.00              | 321.90          | -299.20         | 439.50         | 329.20        | -320.70         | 459.60         | 293.80          | -325.50         | 438.50         | 274.90        | -315.70         | 418.20         | 218.70          | -243.30         | 327.10         | 195.50        | -194.20         | 275.50         | 206.70          | -178.90         | 273.40         | 189.90        | -178.70         | 260.80         |
| 37.28              | 358.90          | -343.60         | 496.40         | 366.50        | -372.30         | 522.50         | 332.50          | -375.30         | 501.40         | 312.40        | -367.20         | 482.10         | 247.30          | -286.70         | 378.60         | 218.90        | -226.60         | 315.10         | 227.60          | -208.70         | 308.80         | 211.40        | -208.90         | 296.80         |
| 28.12              | 403.40          | -402.10         | 569.60         | 414.10        | -441.00         | 605.00         | 381.70          | -441.10         | 583.30         | 362.00        | -434.00         | 565.20         | 285.20          | -343.20         | 446.20         | 250.00        | -268.60         | 366.90         | 256.50          | -243.10         | 357.60         | 239.20        | -248.50         | 344.90         |
| 21.21              | 455.30          | -471.70         | 655.60         | 470.60        | -522.80         | 703.40         | 439.40          | -521.10         | 681.60         | 420.50        | -512.10         | 662.60         | 330.80          | -410.80         | 527.50         | 287.00        | -319.10         | 429.20         | 289.40          | -295.00         | 413.30         | 274.90        | -293.00         | 401.80         |
| 16.00              | 514.10          | -556.60         | 757.70         | 539.50        | -620.30         | 822.20         | 506.90          | -616.50         | 798.10         | 490.00        | -605.60         | 779.00         | 387.10          | -490.40         | 624.80         | 330.90        | -378.50         | 502.80         | 329.10          | -350.50         | 480.80         | 315.20        | -346.30         | 468.30         |
| 12.07              | 581.50          | -658.40         | 878.40         | 619.20        | -735.80         | 961.70         | 584.60          | -730.90         | 936.00         | 568.20        | -713.00         | 911.70         | 455.80          | -583.40         | 740.30         | 381.30        | -448.00         | 588.30         | 376.10          | -415.00         | 560.10         | 362.60        | -408.30         | 546.00         |
| 9.10               | 661.20          | -783.90         | 1026.00        | 716.10        | -873.80         | 1130.00        | 676.30          | -868.40         | 1101.00        | 661.20        | -844.90         | 1073.00        | 538.40          | -692.10         | 876.90         | 442.20        | -523.90         | 689.70         | 432.80          | -491.30         | 654.80         | 419.40        | -482.00         | 638.90         |
| 6.87               | 751.10          | -936.60         | 1201.00        | 824.80        | -1040.00        | 1327.00        | 779.50          | -1035.00        | 1296.00        | 766.60        | -1001.00        | 1261.00        | 637.00          | -818.70         | 1037.00        | 512.50        | -626.20         | 809.20         | 499.80          | -580.80         | 766.20         | 487.30        | -569.50         | 749.60         |
| 5.18               | 853.00          | -1125.00        | 1412.00        | 951.90        | -1235.00        | 1559.00        | 907.10          | -1236.00        | 1533.00        | 884.80        | -1193.00        | 1486.00        | 757.30          | -963.80         | 1226.00        | 595.10        | -736.20         | 946.60         | 579.20          | -686.40         | 898.20         | 564.10        | -670.20         | 876.00         |
| 3.91               | 980.50          | -1355.00        | 1673.00        | 1098.00       | -1473.00        | 1837.00        | 1049.00         | -1480.00        | 1814.00        | 1025.00       | -1426.00        | 1756.00        | 897.80          | -1128.00        | 1442.00        | 694.00        | -873.40         | 1118.00        | 670.10          | -812.10         | 1053.00        | 657.10        | -787.00         | 1025.00        |
| 2.95               | 1123.00         | -1634.00        | 1986.00        | 1260.00       | -1758.00        | 2163.00        | 1217.00         | -1766.00        | 2145.00        | 1184.00       | -1697.00        | 2063.00        | 1060.00         | -1323.00        | 1695.00        | 803.10        | -1036.00        | 1310.00        | 772.80          | -956.60         | 1230.00        | 755.70        | -927.40         | 1196.00        |
| 2.22               | 1311.00         | -1979.00        | 2373.00        | 1468.00       | -2114.00        | 2573.00        | 1408.00         | -2131.00        | 2555.00        | 1381.00       | -2045.00        | 2468.00        | 1242.00         | -1536.00        | 1976.00        | 926.80        | -1220.00        | 1532.00        | 897.50          | -1128.00        | 1441.00        | 876.60        | -1090.00        | 1399.00        |
| 1.68               | 1533.00         | -2406.00        | 2853.00        | 1700.00       | -2542.00        | 3058.00        | 1663.00         | -2590.00        | 307            |               |                 |                |                 |                 |                |               |                 |                |                 |                 |                |               |                 |                |
